# Supplementary material for: Molecular modeling simulation studies reveal new potential inhibitors against HPV E6 protein
Source: PubMed Central journal article supplement (PMC6420176; doi:10.1371/journal.pone.0213028), 2019-03-15
Supplement: pone.0213028.s001.pdf [file pone.0213028.s001.pdf]

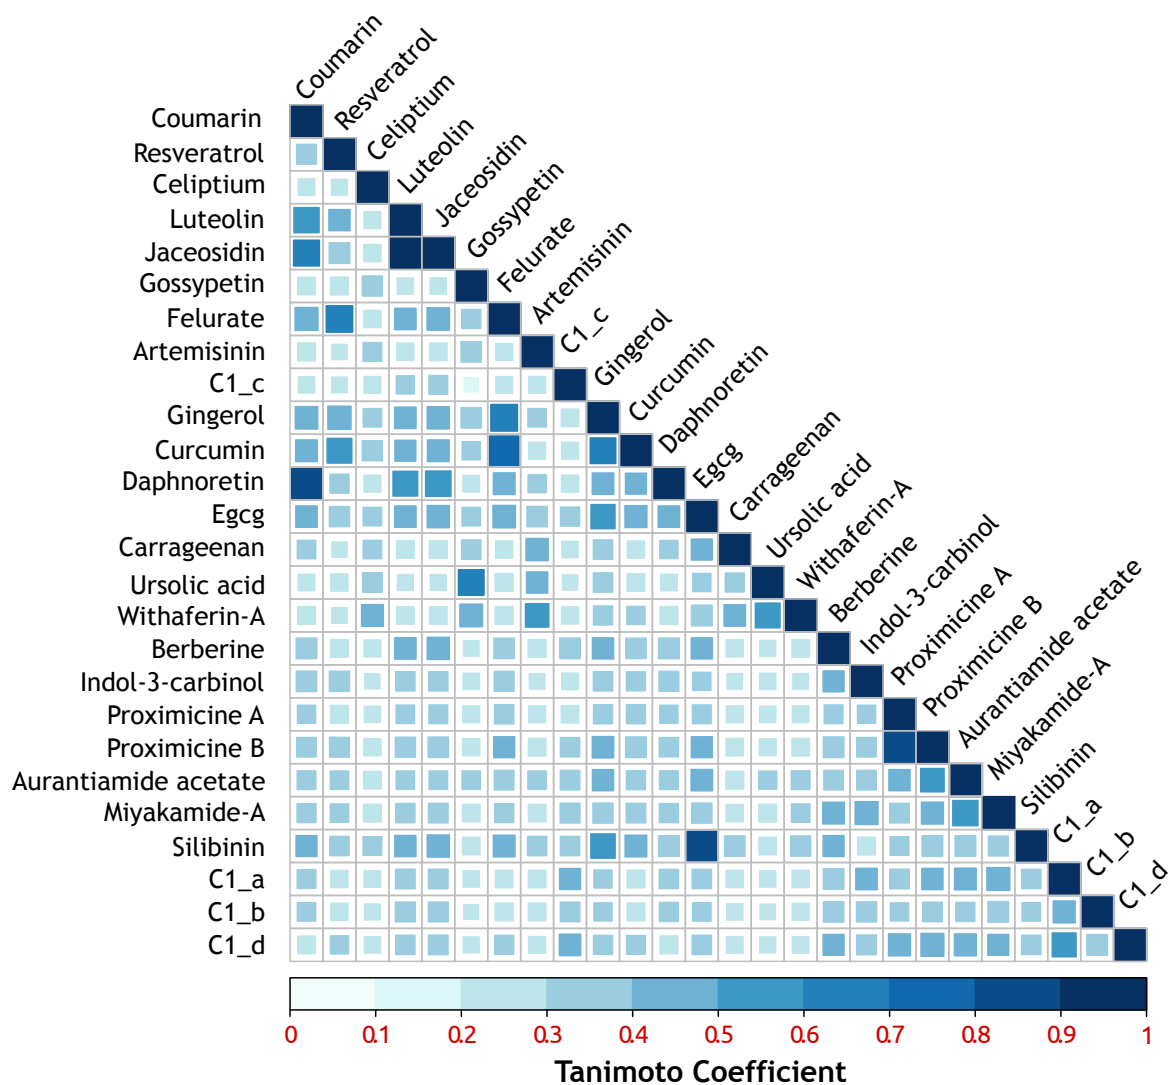

**Figure S1: Tanimoto plot comparing the 26 reference compounds obtained from the literature.** Tanimoto coefficients ( $S_{A,B} = 2c/(a + b)$ ) calculated for each pair of molecules. Values close to 1 (dark blue) imply an absolute 2D structural similarity between the compared molecules.
