# Supplementary material for: Molecular modeling simulation studies reveal new potential inhibitors against HPV E6 protein
Source: PubMed Central journal article supplement (PMC6420176; doi:10.1371/journal.pone.0213028), 2019-03-15
Supplement: pone.0213028.s007.pdf [file pone.0213028.s007.pdf]

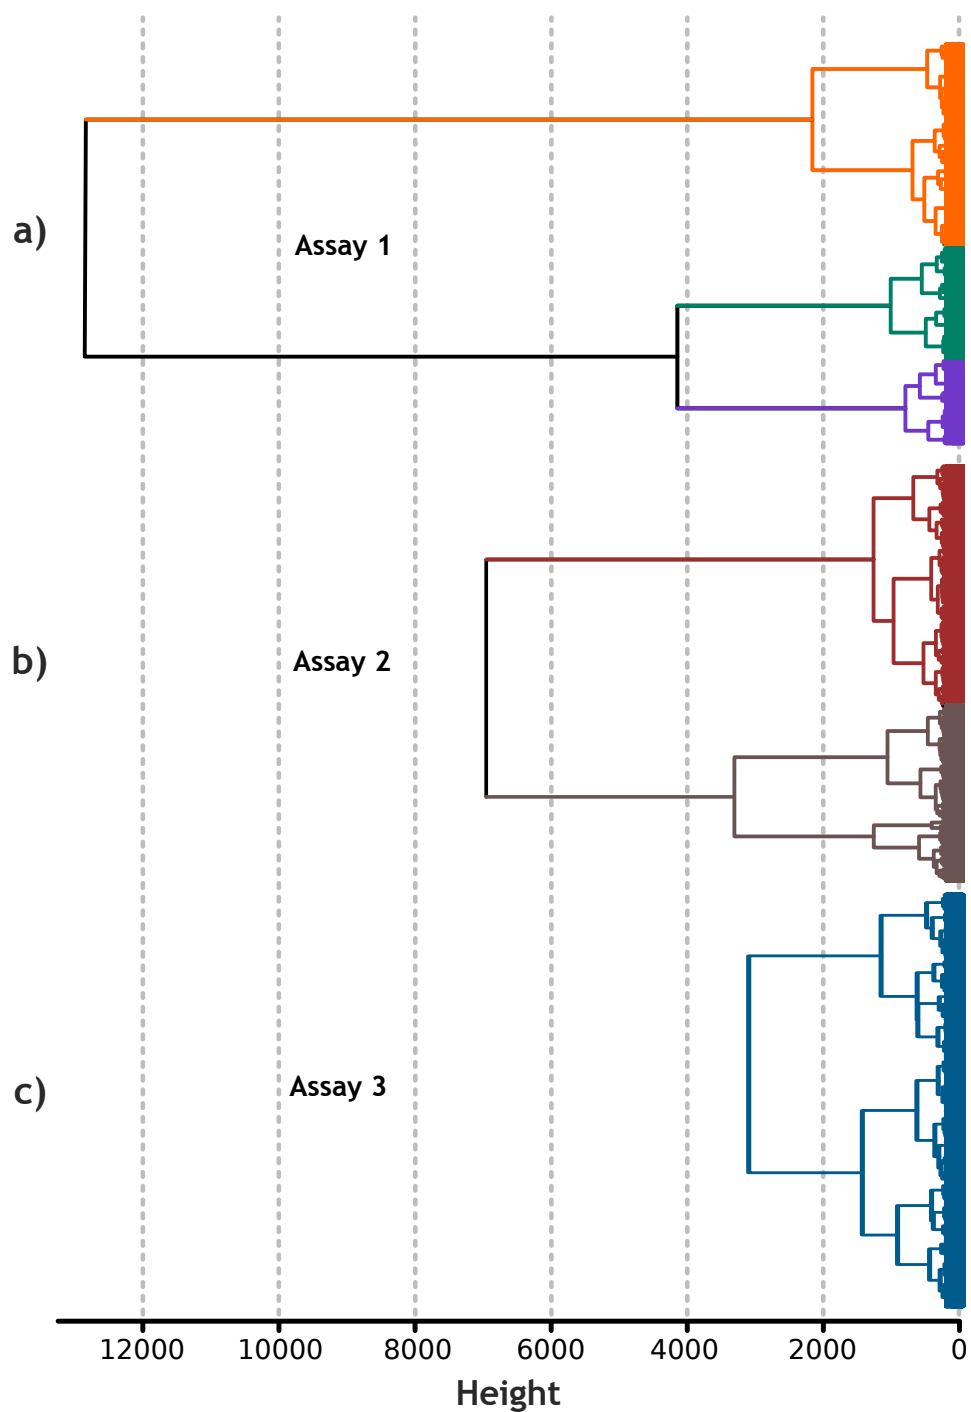

**Figure S7: Dendrograms resulting from hierarchical clustering analysis of the molecular dynamics trajectories of the apo-E6 system.** Each dendrogram was generated using Ward's method and euclidean distance metric over the subspace of the three first principal components obtained in each apo-E6 assay. **a)** Assay 1, three groups chosen. **b)** Assay 2, two groups chosen. **c)** Assay 3, one group chosen.
