# Supplementary material for: Molecular modeling simulation studies reveal new potential inhibitors against HPV E6 protein
Source: PubMed Central journal article supplement (PMC6420176; doi:10.1371/journal.pone.0213028), 2019-03-15
Supplement: pone.0213028.s009.pdf [file pone.0213028.s009.pdf]

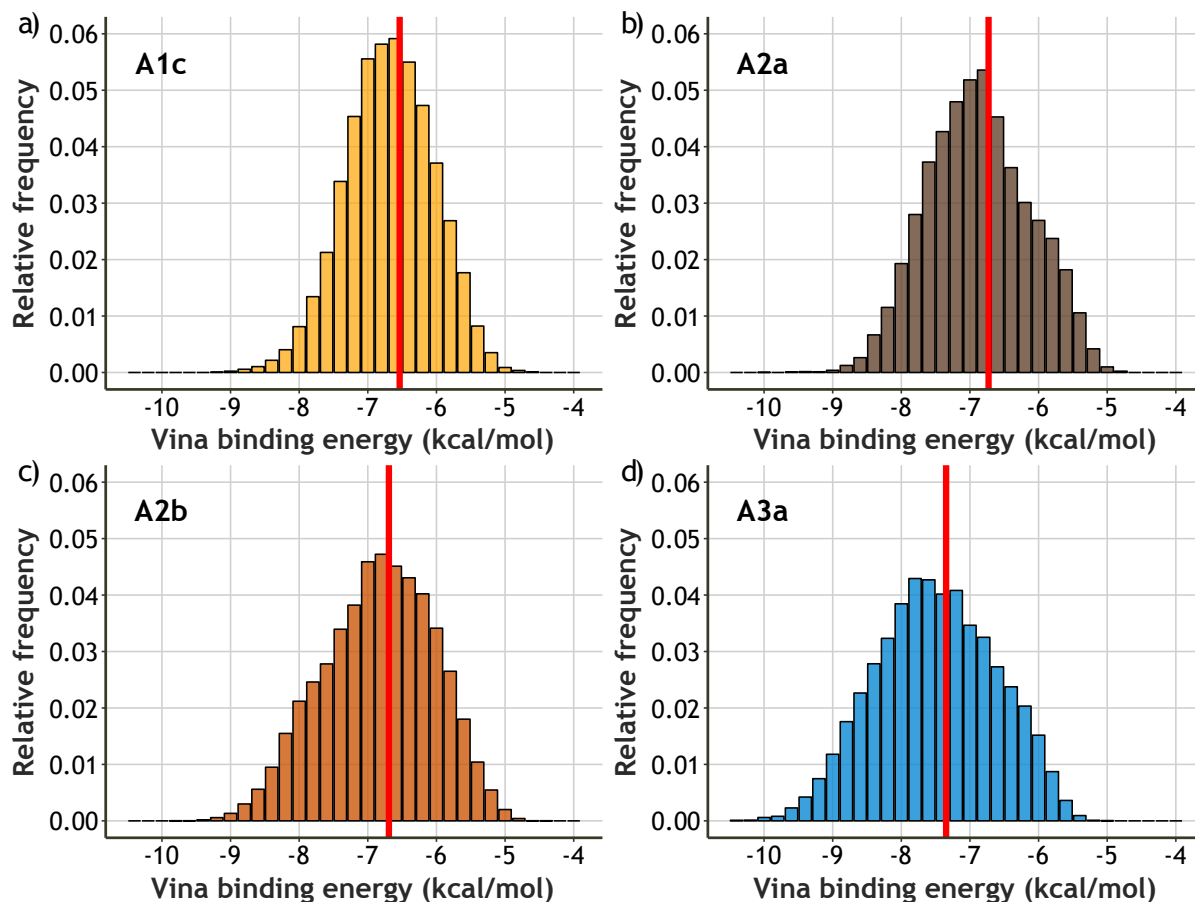

**Figure S9: Ensemble-based Docking results performed with Autodock Vina (Vina).** Histograms showing the relative frequency of the 19,119 molecules according to the Vina binding energy (kcal/mol) to E6 protein. **a)** Assay 1, conformation c. **b)** Assay 2, conformation a. **c)** Assay 2, conformation b. **d)** Assay 3, conformation a.
