# Supplementary material for: Molecular modeling simulation studies reveal new potential inhibitors against HPV E6 protein
Source: PubMed Central journal article supplement (PMC6420176; doi:10.1371/journal.pone.0213028), 2019-03-15
Supplement: pone.0213028.s011.pdf [file pone.0213028.s011.pdf]

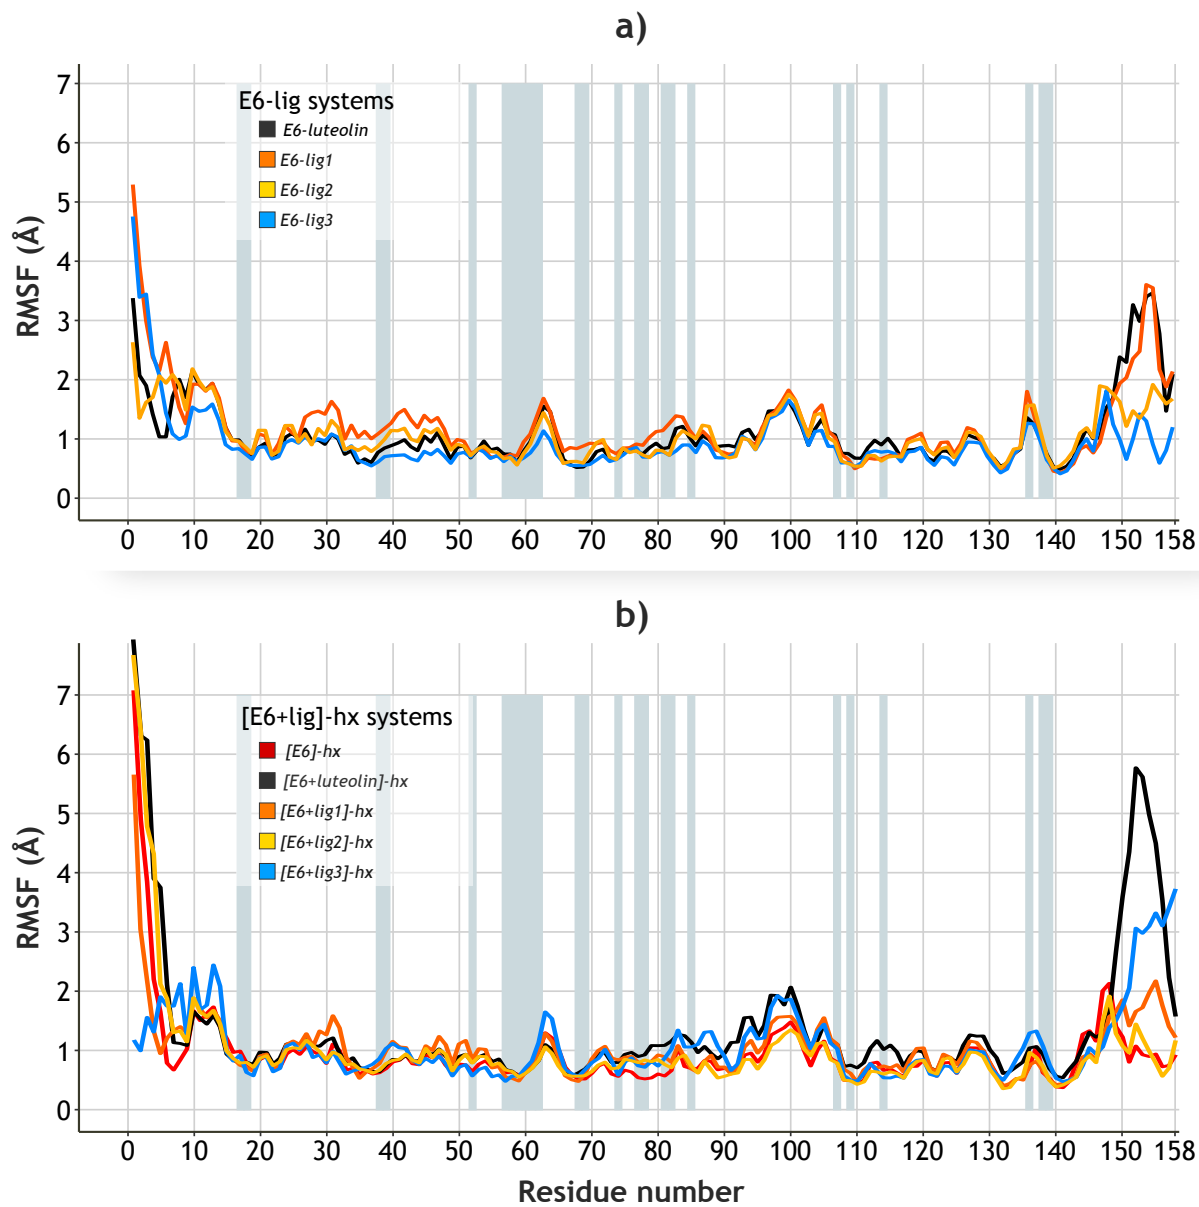

**Figure S11: RMSF values of the E6 protein in the E6-lig and [E6+lig]-hx systems.** a) E6-lig systems, b) [E6+lig]-hx systems. The gray columns in the background indicate the position of pocket residues.
