# Supplementary material for: Molecular modeling simulation studies reveal new potential inhibitors against HPV E6 protein
Source: PubMed Central journal article supplement (PMC6420176; doi:10.1371/journal.pone.0213028), 2019-03-15
Supplement: pone.0213028.s012.pdf [file pone.0213028.s012.pdf]

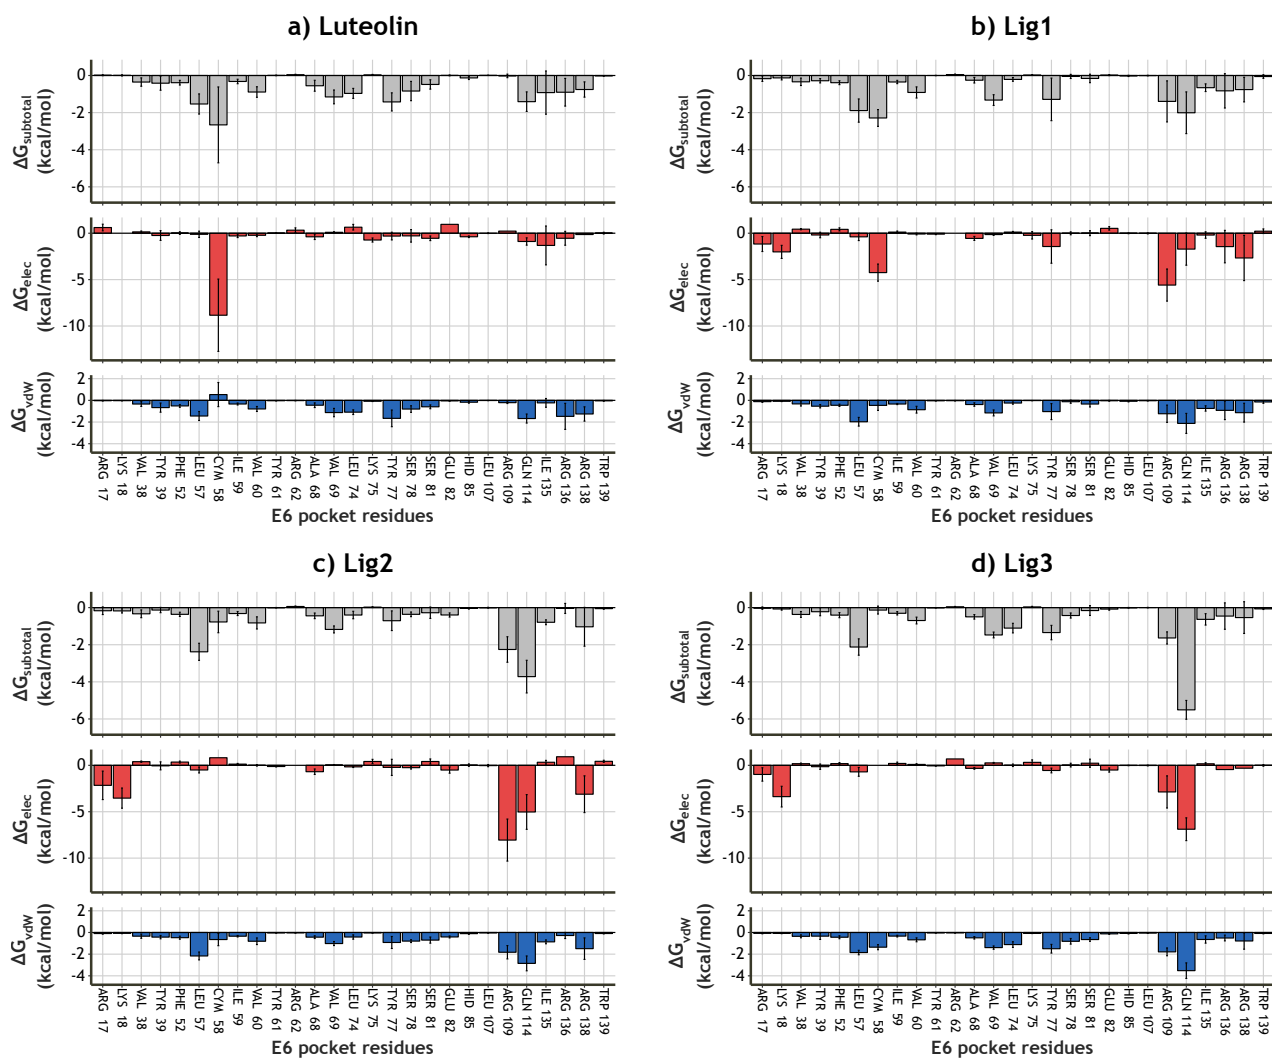

**Figure S12: MM/GBSA binding free energy (BFE) decomposition per residue of each of the four E6-lig systems.** BFE contribution of each E6 pocket residue ( $\Delta G_{subtotal}$ ) to the E6-ligand interaction. Electrostatic interaction energies ( $\Delta G_{elec}$ ) and van der Waals interaction energies ( $\Delta G_{vdW}$ ) are also presented. **a)** [E6+luteolin]-hx, **b)** [E6+lig1]-hx, **c)** [E6+lig2]-hx, and **d)** [E6+lig3]-hx.
