# Supplementary material for: Molecular modeling simulation studies reveal new potential inhibitors against HPV E6 protein
Source: PubMed Central journal article supplement (PMC6420176; doi:10.1371/journal.pone.0213028), 2019-03-15
Supplement: pone.0213028.s013.pdf [file pone.0213028.s013.pdf]

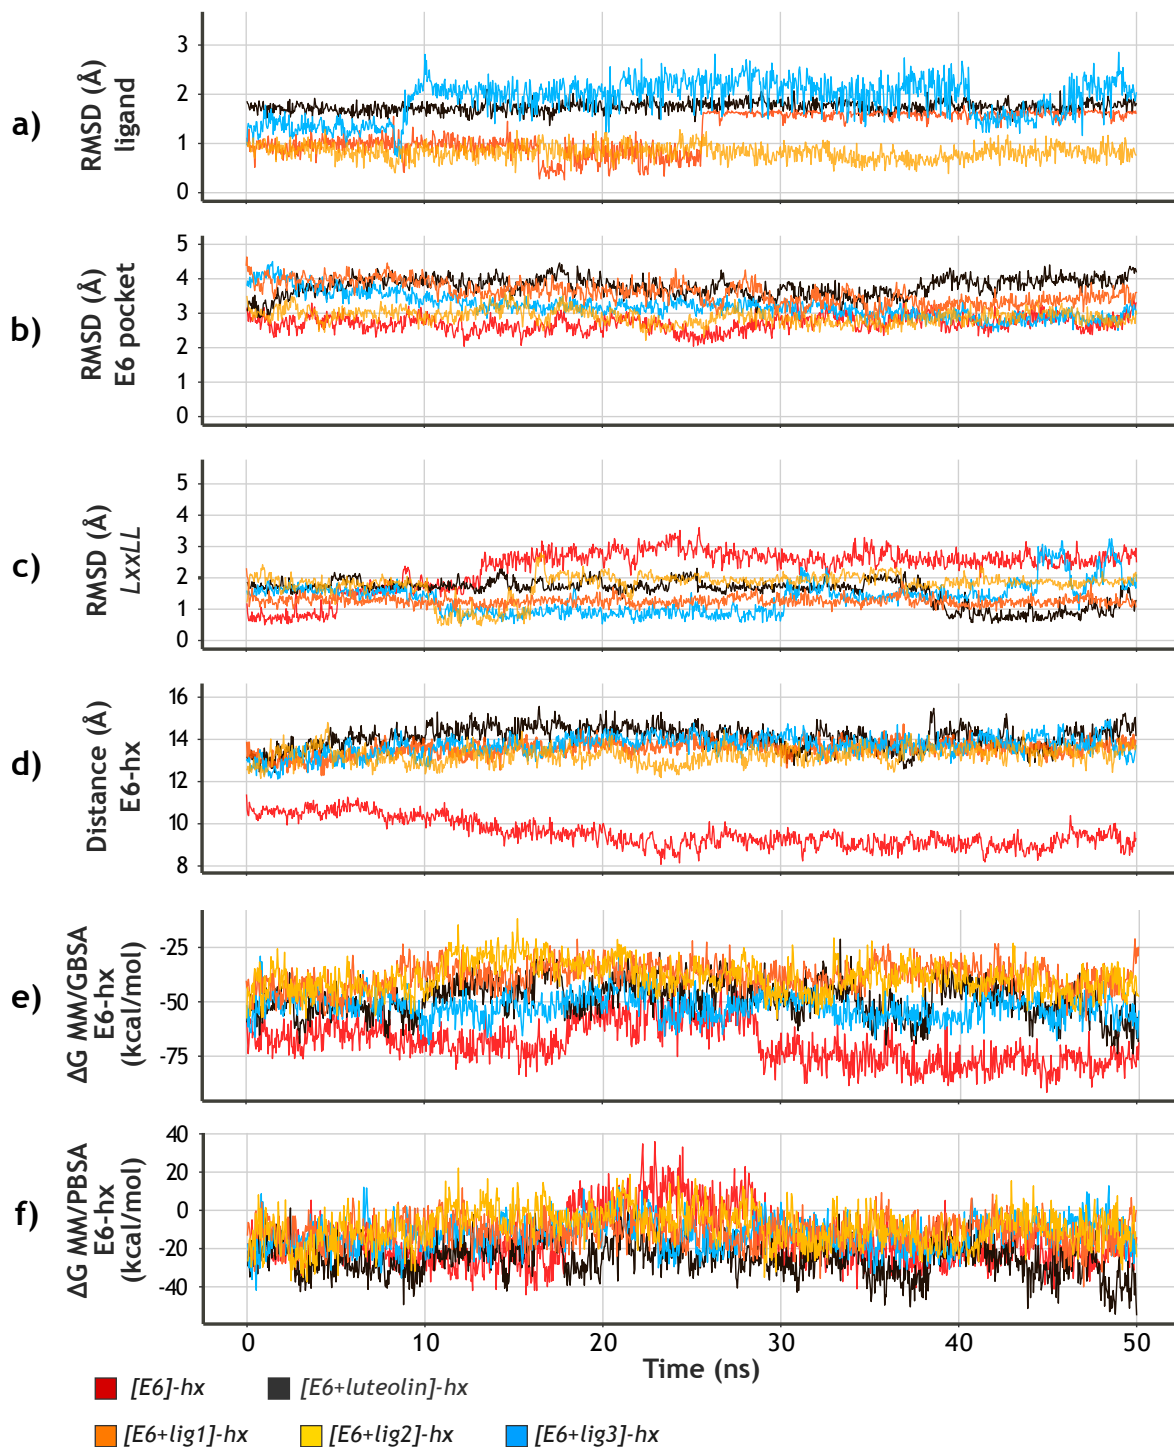

**Figure S13: Molecular dynamics of the protein-ligand-*LxxLL* ([E6+lig]-hx) complexes (50ns).** a) RMSD values of each of the three ligands comparing with its docked pose. b) RMSD values of the E6 pocket. c) RMSD values of the *LxxLL* motif. d) Distance between the center of mass of E6 protein and the center of mass of the *LxxLL* motif. e) MM/GBSA  $\Delta G_{\text{bind}}$  values (kcal/mol), and f) MM/PBSA  $\Delta G_{\text{bind}}$  values (kcal/mol) between E6-ligand complex and *LxxLL* motif.
