# Supplementary material for: Molecular modeling simulation studies reveal new potential inhibitors against HPV E6 protein
Source: PubMed Central journal article supplement (PMC6420176; doi:10.1371/journal.pone.0213028), 2019-03-15
Supplement: pone.0213028.s014.pdf [file pone.0213028.s014.pdf]

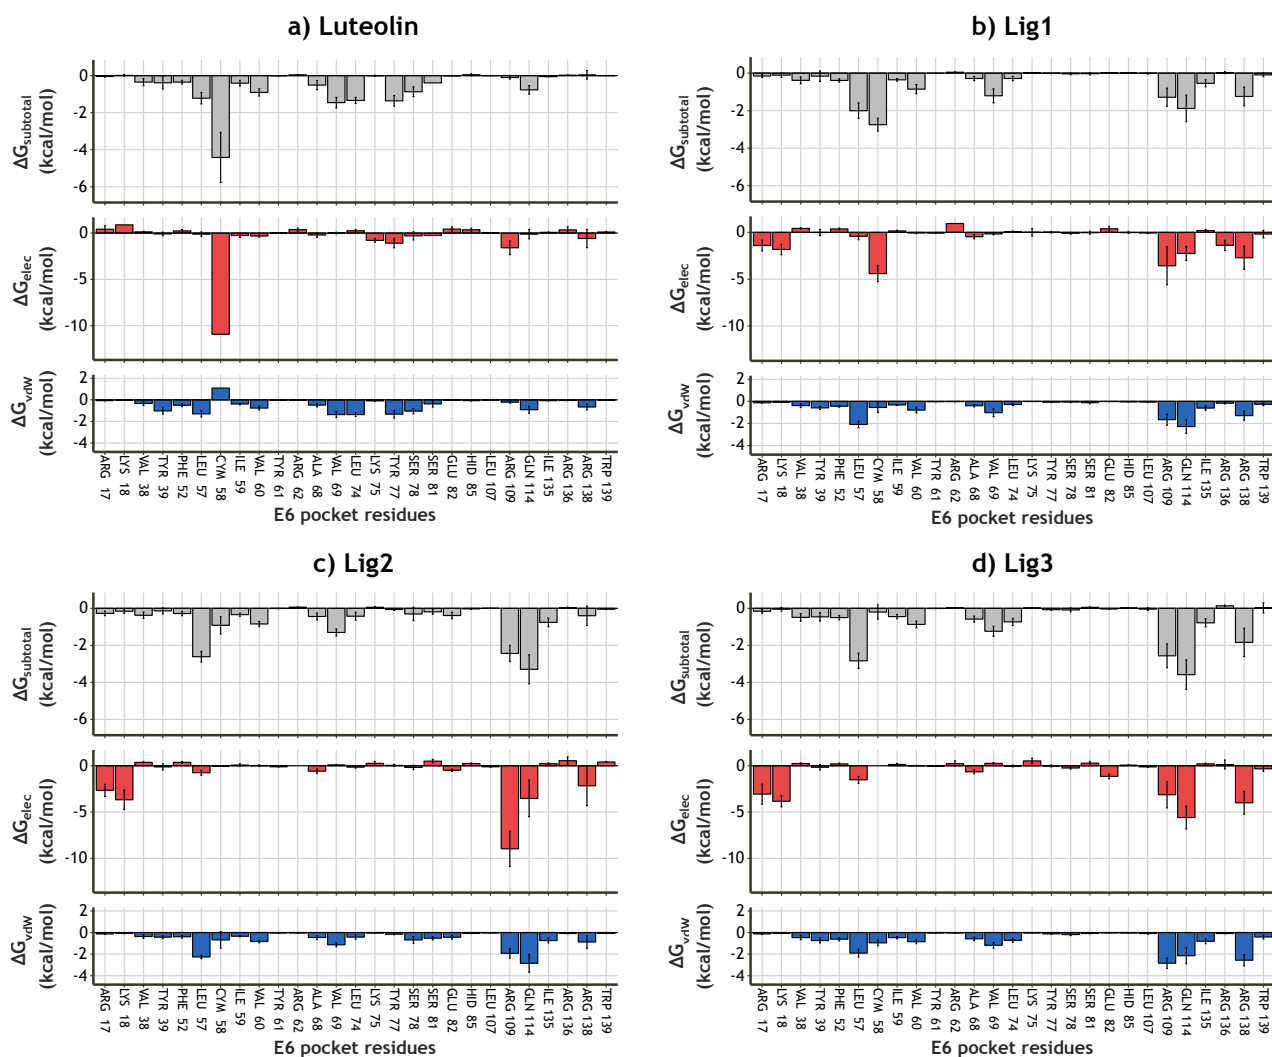

**Figure S14: MM/GBSA binding free energy (BFE) decomposition per residue of each of the four [E6+lig]-hx systems, evaluating E6-ligand interaction. BFE contribution of each E6 pocket residue ( $\Delta G_{subtotal}$ ) to the E6-ligand interaction. Electrostatic interaction energies ( $\Delta G_{elec}$ ) and van der Waals interaction energies ( $\Delta G_{vdW}$ ) are also presented. a) [E6+luteolin]-hx, b) [E6+lig1]-hx, c) [E6+lig2]-hx, and d) [E6+lig3]-hx.**
