# Supplementary material for: Molecular modeling simulation studies reveal new potential inhibitors against HPV E6 protein
Source: PubMed Central journal article supplement (PMC6420176; doi:10.1371/journal.pone.0213028), 2019-03-15
Supplement: pone.0213028.s016.pdf [file pone.0213028.s016.pdf]

**Table S1: Twenty-six reference compounds identified from the literature.** These compounds have shown activity against HPV-positive cells in *in vitro* assays, and/or against E6 protein in *in silico* approaches.

| Structure                                                                           | Name                                             | Structure                                                                            | Name                                                 |
|-------------------------------------------------------------------------------------|--------------------------------------------------|--------------------------------------------------------------------------------------|------------------------------------------------------|
| 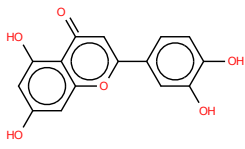   | Luteolin<br>ZINC000018185774 <sup>1-4</sup>      |    | Egcg<br>ZINC000003870412 <sup>5-7</sup>              |
|    | Gossypetin<br>ZINC000006525297 <sup>1</sup>      |    | Ursolic-acid<br>ZINC000003978827 <sup>8-10</sup>     |
|    | Resveratrol<br>ZINC000000006787 <sup>5,10</sup>  |    | Curcumin<br>ZINC000100067274 <sup>11-15</sup>        |
|   | Celiptium<br>ZINC000100089149 <sup>15,16</sup>   |   | Daphnoretin<br>ZINC000000689683 <sup>15</sup>        |
|  | Jaceosidin<br>ZINC000014779854 <sup>4,7,17</sup> |  | Carrageenan<br>ZINC000064373300 <sup>18</sup>        |
|  | Ferulate<br>ZINC000000058258 <sup>16,19</sup>    |  | Withaferin-A<br>ZINC000064373300 <sup>10,20,21</sup> |
|  | Coumarin<br>ZINC000000074709 <sup>22,23</sup>    |  | Gingerol<br>ZINC000001531846 <sup>7,24</sup>         |
|  | Artemisinin<br>ZINC000008681831 <sup>7,25</sup>  |  | Miyakamide-A<br>ZINC000014594537 <sup>26</sup>       |

**Table S1: Twenty-six reference compounds identified from the literature.** These compounds have shown activity against HPV-positive cells in *in vitro* assays, and/or against E6 protein in *in silico* approaches.

| Structure                                                                           | Name                                                   | Structure                                                                            | Name                                            |
|-------------------------------------------------------------------------------------|--------------------------------------------------------|--------------------------------------------------------------------------------------|-------------------------------------------------|
| 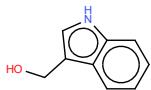   | Indol-3-carbinol<br>ZINC000000158743 <sup>27</sup>     |    | Proximicine-A<br>ZINC000043073751 <sup>26</sup> |
|    | Berberine<br>ZINC000003779067 <sup>28</sup>            |    | Proximicine-B<br>ZINC000043078506 <sup>26</sup> |
|    | Aurantiamide acetate<br>ZINC000013374322 <sup>26</sup> |    | Silibinin<br>ZINC000002033588 <sup>29-31</sup>  |
|    | C1-a<br>ZINC000000100126 <sup>10</sup>                 |    | C1-b<br>ZINC000009679272 <sup>10</sup>          |
|  | C1-c<br>ZINC000000100126 <sup>10</sup>                 |  | C1-d<br>ZINC000009679272 <sup>10</sup>          |

## References

- (1) Malecka, K. A.; Fera, D.; Schultz, D. C.; Hodawadekar, S.; Reichman, M.; Donover, P. S.; Murphy, M. E.; Marmorstein, R. Identification and characterization of small molecule human papillomavirus E6 inhibitors. *ACS Chemical Biology* **2014**, *9*, 1603–1612.
- (2) Ham, S.; Kim, K. H.; Kwon, T. H.; Bak, Y.; Lee, D. H.; Song, Y. S.; Park, S. H.; Park, Y. S.; Kim, M. S.; Kang, J. W.; Hong, J. T.; Yoon, D. Y. Luteolin induces intrinsic apoptosis via inhibition of E6/E7 oncogenes and activation of extrinsic and intrinsic signaling pathways in HPV-18-associated cells. *Oncology Reports* **2014**, *31*, 2683–2691.
- (3) Shah, M.; Anwar, M. A.; Park, S.; Jafri, S. S.; Choi, S. In silico mechanistic analysis of IRF3 inactivation and high-risk HPV E6 species-dependent drug response. *Scientific reports* **2015**, *5*, 13446.
- (4) Cherry, J. J.; Rietz, A.; Malinkevich, A.; Liu, Y.; Xie, M.; Bartolowits, M.; Davisson, V. J.; Baleja, J. D.; Androphy, E. J. Structure based identification and characterization of flavonoids that disrupt human papillomavirus-16 E6 function. *PLoS ONE* **2013**, *8*.
- (5) García-Zepeda, S. P.; García-Villa, E.; Díaz-Chávez, J.; Hernández-Pando, R.; Gariglio, P. Resveratrol induces cell death in cervical cancer cells through apoptosis and autophagy. *European journal of cancer prevention : the official journal of the European Cancer Prevention Organisation (ECP)* **2013**, *22*, 577–84.
- (6) He, L.; Zhang, E.; Shi, J.; Li, X.; Zhou, K.; Zhang, Q.; Le, A. D.; Tang, X. (-)-Epigallocatechin-3-gallate inhibits human papillomavirus (HPV)-16 oncoprotein-induced angiogenesis in non-small cell lung cancer cells by targeting HIF-1 $\alpha$ . *Cancer Chemother Pharmacol* **2013**, *71*, 713–725.

- (7) Kumar, S.; Jena, L.; Sahoo, M.; Nayak, T.; Mohod, K.; Daf, S.; Varma, A. K. The in Silico Approach to Identifying a Unique Plant-Derived Inhibitor Against E6 and E7 Oncogenic Proteins of High-Risk Human Papillomavirus 16 and 18. *Avicenna Journal of Medical Biochemistry* **2016**, *In Press*.
- (8) Kassi, E.; Papoutsis, Z.; Pratsinis, H.; Aliogiannis, N.; Manoussakis, M.; Moutsatsou, P. Ursolic acid, a naturally occurring triterpenoid, demonstrates anticancer activity on human prostate cancer cells. *Journal of Cancer Research and Clinical Oncology* **2007**, *133*, 493–500.
- (9) Yim, E. K.; Lee, M. J.; Lee, K. H.; Um, S. J.; Park, J. S. Antiproliferative and antiviral mechanisms of ursolic acid and dexamethasone in cervical carcinoma cell lines. *International Journal of Gynecological Cancer* **2006**, *16*, 2023–2031.
- (10) Kumar, S.; Jena, L.; Mohod, K.; Daf, S.; Varma, A. K. Virtual Screening for Potential Inhibitors of High-Risk Human Papillomavirus 16 E6 Protein. *Interdisciplinary Sciences: Computational Life Sciences* **2015**, *7*, 136–142.
- (11) Divya, C. S.; Pillai, M. R. Antitumor action of curcumin in human papillomavirus associated cells involves downregulation of viral oncogenes, prevention of NFkB and AP-1 translocation, and modulation of apoptosis. *Molecular Carcinogenesis* **2006**, *45*, 320–332.
- (12) Maher, D. M.; Bell, M. C.; O'Donnell, E. A.; Gupta, B. K.; Jaggi, M.; Chauhan, S. C. Curcumin suppresses human papillomavirus oncoproteins, restores p53, rb, and ptpn13 proteins and inhibits benzo[a]pyrene-induced upregulation of HPV E7. *Molecular Carcinogenesis* **2011**, *50*, 47–57.
- (13) Basu, P.; et al, Clearance of Cervical Human Papillomavirus Infection by Topical Application of Curcumin and Curcumin. *Asian Pacific Journal of Cancer Prevention* **2013**, *14*, 5753–5759.

- (14) Singh, A. K.; Misra, K. Human papilloma virus 16 e6 protein as a target for curcuminoids, curcumin conjugates and congeners for chemoprevention of oral and cervical cancers. *Interdisciplinary Sciences: Computational Life Sciences* **2013**, *5*, 112–118.
- (15) Mamgain, S.; Sharma, P.; Pathak, R. K.; Baunthiyal, M. Computer aided screening of natural compounds targeting the E6 protein of HPV using molecular docking. *Bioinformatics* **2015**, *11*, 236–242.
- (16) Kumar, S.; Jena, L.; Sahoo, M.; Kakde, M.; Daf, S.; Varma, A. K. In Silico Docking to Explicate Interface between Plant-Originated Inhibitors and E6 Oncogenic Protein of Highly Threatening Human Papillomavirus 18. *Genomics & Informatics* **2015**, *13*, 60.
- (17) Lee, H. G.; Yu, K. A.; Oh, W. K.; Baeg, T. W.; Oh, H. C.; Ahn, J. S.; Jang, W. C.; Kim, J. W.; Lim, J. S.; Choe, Y. K.; Yoon, D. Y. Inhibitory effect of jaceosidin isolated from *Artemisia argyi* on the function of E6 and E7 oncoproteins of HPV 16. *Journal of Ethnopharmacology* **2005**, *98*, 339–343.
- (18) Buck, C. B.; Thompson, C. D.; Roberts, J. N.; Müller, M.; Lowy, D. R.; Schiller, J. T. Carrageenan is a potent inhibitor of papillomavirus infection. *PLoS Pathogens* **2006**, *2*, 0671–0680.
- (19) Palasap, A.; Limpai boon, T.; Boonsiri, P.; Thapphasaraphong, S.; Daduang, S.; Suwanalert, P.; Daduang, J. Cytotoxic effects of phytophenolics from *Caesalpinia mimosoides* Lamk on cervical carcinoma cell lines through an apoptotic pathway. *Asian Pacific Journal of Cancer Prevention* **2014**, *15*, 449–454.
- (20) Park, J. W.; Min, K.-J.; Kim, D. E.; Kwon, T. K. Withaferin A induces apoptosis through the generation of thiol oxidation in human head and neck cancer cells. *International Journal of Molecular Medicine* **2015**, *35*, 247–252.
- (21) Munagala, R.; Kausar, H.; Munjal, C.; Gupta, R. C. Withaferin a induces p53-

- dependent apoptosis by repression of HPV oncogenes and upregulation of tumor suppressor proteins in human cervical cancer cells. *Carcinogenesis* **2011**, *32*, 1697–1705.
- (22) Benci, K.; Mandić, L.; Suhina, T.; Sedić, M.; Klobučar, M.; Pavelić, S. K.; Pavelić, K.; Wittine, K.; Mintas, M. Novel coumarin derivatives containing 1,2,4-triazole, 4,5-dicyanoimidazole and purine moieties: Synthesis and evaluation of their cytostatic activity. *Molecules* **2012**,
- (23) Lacy, A. Studies on Coumarins and Coumarin-Related Compounds to Determine their Therapeutic Role in the Treatment of Cancer. *Current Pharmaceutical Design* **2004**,
- (24) Kapoor, V.; Aggarwal, S.; Das, S. N. 6-Gingerol Mediates its Anti Tumor Activities in Human Oral and Cervical Cancer Cell Lines through Apoptosis and Cell Cycle Arrest. *Phytotherapy Research* **2016**, *30*, 588–595.
- (25) Jansen, F. H.; Adoubi, I.; J, C. K.; T, D. E. C.; Jansen, N.; Tschulakow, A.; Efferth, T. First study of oral Artenimol-R in advanced cervical cancer: clinical benefit, tolerability and tumor markers. *Anticancer research* **2011**, *31*, 4417–4422.
- (26) John, G.; Kotadiya, R. In silico approach to identify putative drugs from natural products for human papillomavirus ( HPV ) which cause cervical cancer. **2015**,
- (27) Bell, M. C.; Crowley-Nowick, P.; Bradlow, H. L.; Sepkovic, D. W.; Schmidt-Grimminger, D.; Howell, P.; Mayeaux, E. J.; Tucker, a.; Turbat-Herrera, E. a.; Mathis, J. M. Placebo-controlled trial of indole-3-carbinol in the treatment of CIN. *Gynecologic oncology* **2000**, *78*, 123–9.
- (28) Saha, S. K.; Khuda-Bukhsh, A. R. Berberine alters epigenetic modifications, disrupts microtubule network, and modulates HPV-18 E6-E7 oncoproteins by targeting p53 in cervical cancer cell HeLa: A mechanistic study including molecular docking. *European Journal of Pharmacology* **2015**, *744*, 132–146.

- (29) Pirouzpanah, M. B.; Sabzichi, M.; Pirouzpanah, S.; Chavoshi, H.; Samadi, N. Silibinin induces apoptosis in breast cancer cells by modulating p53, p21, bak and bcl-xl pathways. *Asian Pacific Journal of Cancer Prevention* **2015**, *16*, 2087–2092.
- (30) Huang, Q.; Wu, L. J.; Tashiro, S.; Onodera, S.; Li, L. H.; Ikejima, T. Silymarin augments human cervical cancer HeLa cell apoptosis via P38/JNK MAPK pathways in serum-free medium. *J Asian Nat Prod Res* **2005**, *7*, 701–709.
- (31) Yu, H. C.; Chen, L. J.; Cheng, K. C.; Li, Y. X.; Yeh, C. H.; Cheng, J. T. Silymarin inhibits cervical cancer cell through an increase of phosphatase and tensin homolog. *Phytotherapy Research* **2012**, *26*, 709–715.
